# Supplementary material
Source: publisher site journal article supplement (https://www.dovepress.com/article/511374)
Supplement: Supplementary file 1 [file Supplementary%20Files.pdf]

**Table S1:** Five inheritance models analysis of associations between the genotypes of SATB2 rs1900327 with antipsychotic response

| Model        | Genotype | Poor responder (%) | Good responder (%) | OR (95% CI)      | <i>P</i> -value | AIC   | BIC   |
|--------------|----------|--------------------|--------------------|------------------|-----------------|-------|-------|
| Codominant   | A/A      | 22 (61.1%)         | 142 (75.9%)        | 1.00             | 0.18            | 201   | 218   |
|              | A/T      | 13 (36.1%)         | 41 (21.9%)         | 0.49 (0.22-1.06) |                 |       |       |
|              | T/T      | 1 (2.8%)           | 4 (2.1%)           | 0.46 (0.05-4.55) |                 |       |       |
| Dominant     | A/A      | 22 (61.1%)         | 142 (75.9%)        | 1.00             | 0.066           | 199   | 212.6 |
|              | A/T-T/T  | 14 (38.9%)         | 45 (24.1%)         | 0.48 (0.23-1.03) |                 |       |       |
| Recessive    | A/A-A/T  | 35 (97.2%)         | 183 (97.9%)        | 1.00             | 0.64            | 202.1 | 215.7 |
|              | T/T      | 1 (2.8%)           | 4 (2.1%)           | 0.57 (0.06-5.49) |                 |       |       |
| Overdominant | A/A-T/T  | 23 (63.9%)         | 146 (78.1%)        | 1.00             | 0.083           | 199.3 | 213   |
|              | A/T      | 13 (36.1%)         | 41 (21.9%)         | 0.50 (0.23-1.08) |                 |       |       |
| Log-additive | ---      | ---                | ---                | 0.54 (0.28-1.05) | 0.078           | 199.2 | 212.9 |

AIC, Akaike Information Criterion. BIC, Bayesian information criterion.

**Table S2:** Five inheritance models analysis of associations between the genotypes of SATB2 rs7557687 with antipsychotic response

| Model        | Genotype | Poor responder (%) | Good responder (%) | OR (95% CI)      | <i>P</i> -value | AIC   | BIC   |
|--------------|----------|--------------------|--------------------|------------------|-----------------|-------|-------|
| Codominant   | A/A      | 22 (61.1%)         | 142 (75.5%)        | 1.00             | 0.2             | 201.4 | 218.4 |
|              | A/G      | 13 (36.1%)         | 42 (22.3%)         | 0.50 (0.23-1.08) |                 |       |       |
|              | G/G      | 1 (2.8%)           | 4 (2.1%)           | 0.46 (0.05-4.54) |                 |       |       |
| Dominant     | A/A      | 22 (61.1%)         | 142 (75.5%)        | 1.00             | 0.072           | 199.4 | 213   |
|              | A/G-G/G  | 14 (38.9%)         | 46 (24.5%)         | 0.49 (0.23-1.05) |                 |       |       |
| Recessive    | A/A-A/G  | 35 (97.2%)         | 184 (97.9%)        | 1.00             | 0.64            | 202.4 | 216   |
|              | G/G      | 1 (2.8%)           | 4 (2.1%)           | 0.57 (0.06-5.46) |                 |       |       |
| Overdominant | A/A-G/G  | 23 (63.9%)         | 146 (77.7%)        | 1.00             | 0.091           | 199.8 | 213.4 |
|              | A/G      | 13 (36.1%)         | 42 (22.3%)         | 0.51 (0.23-1.10) |                 |       |       |
| Log-additive | ---      | ---                | ---                | 0.55 (0.28-1.06) | 0.084           | 199.6 | 213.3 |

AIC, Akaike Information Criterion. BIC, Bayesian information criterion.

**Table S3:** Five inheritance models analysis of associations between the genotypes of SATB2 rs733156 with antipsychotic response

| Model        | Genotype | Poor responder (%) | Good responder (%) | OR (95% CI)      | <i>P</i> -value | AIC   | BIC   |
|--------------|----------|--------------------|--------------------|------------------|-----------------|-------|-------|
| Codominant   | C/C      | 22 (61.1%)         | 140 (75.7%)        | 1.00             | 0.2             | 200.2 | 217.2 |
|              | T/C      | 13 (36.1%)         | 41 (22.2%)         | 0.49 (0.23-1.08) |                 |       |       |
|              | T/T      | 1 (2.8%)           | 4 (2.2%)           | 0.47 (0.05-4.61) |                 |       |       |
| Dominant     | C/C      | 22 (61.1%)         | 140 (75.7%)        | 1.00             | 0.072           | 198.2 | 211.8 |
|              | T/C-T/T  | 14 (38.9%)         | 45 (24.3%)         | 0.49 (0.23-1.05) |                 |       |       |
| Recessive    | C/C-T/C  | 35 (97.2%)         | 181 (97.8%)        | 1.00             | 0.65            | 201.3 | 214.8 |
|              | T/T      | 1 (2.8%)           | 4 (2.2%)           | 0.57 (0.06-5.53) |                 |       |       |
| Overdominant | C/C-T/T  | 23 (63.9%)         | 144 (77.8%)        | 1.00             | 0.09            | 198.6 | 212.2 |
|              | T/C      | 13 (36.1%)         | 41 (22.2%)         | 0.51 (0.23-1.09) |                 |       |       |
| Log-additive | ---      | ---                | ---                | 0.55 (0.28-1.06) | 0.084           | 198.5 | 212.1 |

AIC, Akaike Information Criterion. BIC, Bayesian information criterion.

**Table S4:** Five inheritance models analysis of associations between the genotypes of SATB2 rs6745135 with antipsychotic response

| Model        | Genotype | Poor responder (%) | Good responder (%) | OR (95% CI)      | <i>P</i> -value | AIC   | BIC   |
|--------------|----------|--------------------|--------------------|------------------|-----------------|-------|-------|
| Codominant   | C/C      | 22 (61.1%)         | 142 (76.8%)        | 1.00             | 0.16            | 200.1 | 217.1 |
|              | C/T      | 13 (36.1%)         | 39 (21.1%)         | 0.47 (0.22-1.02) |                 |       |       |
|              | T/T      | 1 (2.8%)           | 4 (2.2%)           | 0.47 (0.05-4.61) |                 |       |       |
| Dominant     | C/C      | 22 (61.1%)         | 142 (76.8%)        | 1.00             | 0.055           | 198.1 | 211.7 |
|              | C/T-T/T  | 14 (38.9%)         | 43 (23.2%)         | 0.47 (0.22-1.00) |                 |       |       |
| Recessive    | C/C-C/T  | 35 (97.2%)         | 181 (97.8%)        | 1.00             | 0.65            | 201.6 | 215.2 |
|              | T/T      | 1 (2.8%)           | 4 (2.2%)           | 0.58 (0.06-5.59) |                 |       |       |
| Overdominant | C/C-T/T  | 23 (63.9%)         | 146 (78.9%)        | 1.00             | 0.069           | 198.5 | 212.1 |
|              | C/T      | 13 (36.1%)         | 39 (21.1%)         | 0.48 (0.22-1.04) |                 |       |       |
| Log-additive | ---      | ---                | ---                | 0.53 (0.28-1.03) | 0.068           | 198.5 | 212.1 |

AIC, Akaike Information Criterion. BIC, Bayesian information criterion.

Table S5 Comparison of drug efficacy of aripiprazole and polymorphism of SATB2

| SNP       | Genotype/<br>Allele | Good<br>responder | Poor<br>responder | $\chi^2$ | <i>P-value</i> |
|-----------|---------------------|-------------------|-------------------|----------|----------------|
| rs1900327 | AA                  | 22                | 6                 | 0.563    | 0.755          |
|           | AT                  | 9                 | 2                 |          |                |
|           | TT                  | 2                 | 0                 |          |                |
| rs7557687 | A                   | 53                | 14                | 0.446    | 0.504          |
|           | T                   | 13                | 2                 |          |                |
|           | AA                  | 22                | 6                 |          |                |
| rs733156  | AG                  | 9                 | 2                 | 0.563    | 0.755          |
|           | GG                  | 2                 | 0                 |          |                |
|           | A                   | 53                | 14                |          |                |
| G         | 13                  | 2                 |                   |          |                |
| rs733156  | CC                  | 22                | 6                 | 0.370    | 0.831          |
|           | TC                  | 10                | 2                 |          |                |
|           | TT                  | 1                 | 0                 |          |                |
|           | C                   | 54                | 14                | 0.294    | 0.588          |

|           |    |    |    |       |       |
|-----------|----|----|----|-------|-------|
|           | T  | 12 | 2  |       |       |
|           | CC | 22 | 6  |       |       |
|           | CT | 9  | 2  | 0.563 | 0.755 |
| rs6745135 | TT | 2  | 0  |       |       |
|           | C  | 53 | 14 |       |       |
|           |    |    |    | 0.446 | 0.504 |
|           | T  | 13 | 2  |       |       |

Table S6 Comparison of drug efficacy of olanzapine and polymorphism of SATB2

| SNP       | Genotype/<br>Allele | Good<br>responder | Poor<br>responder | $\chi^2$ | <i>P-value</i> |
|-----------|---------------------|-------------------|-------------------|----------|----------------|
|           | AA                  | 60                | 11                |          |                |
|           | AT                  | 21                | 3                 | 0.475    | 0.789          |
| rs1900327 | TT                  | 2                 | 0                 |          |                |
|           | A                   | 141               | 25                |          |                |
|           | T                   | 25                | 3                 | 0.366    | 0.545          |
|           | AA                  | 61                | 11                |          |                |
| rs7557687 | AG                  | 21                | 3                 | 0.454    | 0.797          |
|           | GG                  | 2                 | 0                 |          |                |

---

|           |    |     |    |       |       |
|-----------|----|-----|----|-------|-------|
|           | A  | 141 | 25 |       |       |
|           |    |     |    | 0.340 | 0.560 |
|           | G  | 25  | 3  |       |       |
|           | CC | 61  | 11 |       |       |
|           | TC | 21  | 3  | 0.454 | 0.797 |
| rs733156  | TT | 2   | 0  |       |       |
|           | C  | 143 | 25 |       |       |
|           |    |     |    | 0.340 | 0.560 |
|           | T  | 25  | 3  |       |       |
|           | CC | 61  | 11 |       |       |
|           | CT | 19  | 3  | 0.385 | 0.825 |
| rs6745135 | TT | 2   | 0  |       |       |
|           | C  | 141 | 25 |       |       |
|           |    |     |    | 0.224 | 0.636 |
|           | T  | 23  | 3  |       |       |

---

Supplementary of SNP genotyping

| Sample   | rs16141 | rs16145 | rs5573 | rs1900327 | rs7557687 | rs733156 | rs6745135 |
|----------|---------|---------|--------|-----------|-----------|----------|-----------|
| YX130001 | T/T     | G/G     | A/A    | A/A       | A/A       | C/C      | C/C       |
| YX130002 | T/T     | G/G     | A/A    | A/A       | A/A       | C/C      | C/C       |
| YX130003 | T/T     | T/T     | A/G    | A/A       | A/A       | C/C      | C/C       |

|          |     |     |     |     |     |     |     |
|----------|-----|-----|-----|-----|-----|-----|-----|
| YX130015 | G/T | T/T | G/G | A/T | A/G | T/C | C/T |
| YX130021 | T/T | T/T | A/G | A/A | A/A | C/C | C/C |
| YX130026 | T/T | G/G | A/A | A/A | A/A | C/C | C/C |
| YX130029 | T/T | G/G | A/A | A/A | A/A | C/C | C/C |
| YX130032 | G/T | T/T | G/G | A/A | A/A | C/C | C/C |
| YX130033 | T/T | T/T | A/G | T/T | G/G | T/T | T/T |
| YX130034 | T/T | G/G | A/A | A/T | A/G | T/C | C/T |
| YX130037 | T/T | T/T | A/G | A/A | A/A | C/C | C/C |
| YX130039 | T/T | G/G | A/A | A/T | A/G | T/C | C/T |
| YX130040 | T/T | T/T | A/G | A/A | A/A | C/C | C/C |
| YX130041 | T/T | G/G | A/A | A/A | A/A | C/C | C/C |
| YX130043 | T/T | G/G | A/A | A/A | A/A | C/C | C/C |
| YX130045 | T/T | G/G | A/A | A/A | A/A | C/C | C/C |
| YX130047 | T/T | T/T | A/G | A/A | A/A | C/C | C/C |
| YX130048 | G/T | T/T | G/G | A/T | A/G | T/C | C/T |
| YX130053 | T/T | G/G | A/A | A/A | A/A | -   | C/C |
| YX130057 | T/T | G/G | A/A | A/A | A/A | C/C | C/C |
| YX130058 | T/T | G/G | A/A | A/A | A/A | C/C | C/C |
| YX130059 | T/T | T/T | A/G | A/A | A/A | C/C | C/C |
| YX130060 | T/T | T/T | A/G | A/A | A/A | C/C | C/C |

|            |     |     |     |     |     |     |     |
|------------|-----|-----|-----|-----|-----|-----|-----|
| YX130061   | T/T | G/G | A/A | A/A | A/A | C/C | C/C |
| YX130062   | T/T | G/G | A/A | A/A | A/A | C/C | C/C |
| YX130063   | T/T | T/T | A/G | A/T | A/G | T/C | C/T |
| YX130064   | T/T | T/T | A/G | A/T | A/G | T/C | C/T |
| YX130065   | T/T | G/G | A/A | A/A | A/A | C/C | C/C |
| YX130066   | T/T | G/G | A/A | A/T | A/G | T/C | C/T |
| YX130069   | T/T | T/T | A/G | A/A | A/A | C/C | C/C |
| YX130070   | T/T | T/T | -   | A/A | A/A | C/C | C/C |
| YX130071   | T/T | T/T | A/G | A/T | A/G | T/C | C/T |
| YX130072   | T/T | T/T | A/G | A/A | A/A | C/C | C/C |
| YX130073   | T/T | G/G | A/A | A/A | A/A | C/C | C/C |
| YX130074   | G/T | T/T | G/G | A/A | A/A | C/C | C/C |
| YX130075   | T/T | T/T | A/G | A/A | A/A | C/C | C/C |
| YX130076   | T/T | G/G | A/A | A/A | A/A | C/C | C/C |
| YX130077   | T/T | G/G | A/A | A/T | A/G | T/C | C/T |
| YX130078   | T/T | G/G | A/A | A/A | A/A | C/C | C/C |
| YX130079   | T/T | T/T | A/G | A/T | A/G | T/C | C/T |
| YX130084   | T/T | G/G | A/A | A/A | A/A | C/C | C/C |
| YX130085   | T/T | T/T | A/G | A/A | A/A | C/C | C/C |
| YX130202BA | T/T | T/T | A/G | A/T | A/G | T/C | C/T |

|            |     |     |     |     |     |     |     |
|------------|-----|-----|-----|-----|-----|-----|-----|
| YX130203BA | T/T | G/G | A/A | A/T | A/G | T/C | C/T |
| YX130206BA | T/T | G/G | A/A | A/T | A/G | T/C | C/T |
| YX130209BA | T/T | G/G | A/A | A/A | A/A | C/C | C/C |
| YX130251BA | T/T | G/G | A/A | A/A | A/A | C/C | C/C |
| YX130252BA | T/T | G/G | A/A | A/A | A/A | C/C | C/C |
| YX130253BA | T/T | T/T | A/G | A/A | A/A | C/C | C/C |
| YX130254BA | T/T | T/T | A/G | A/A | A/A | C/C | C/C |
| YX130255BA | T/T | G/G | A/A | A/A | A/A | C/C | C/C |
| YX130256BA | T/T | G/G | A/A | T/T | G/G | T/T | T/T |
| YX130257BA | T/T | G/G | A/A | A/A | A/A | C/C | C/C |
| YX130259BA | G/T | T/T | G/G | A/T | A/G | T/C | C/T |
| YX130261BA | T/T | T/T | A/G | A/A | A/A | C/C | C/C |
| YX130262BA | T/T | G/G | A/A | A/T | A/G | T/C | -   |
| YX130263BA | T/T | G/G | A/A | A/A | A/A | C/C | C/C |
| YX130264BA | T/T | G/G | A/A | A/T | A/G | T/C | C/T |
| YX130265BA | T/T | T/T | A/G | A/A | A/A | C/C | C/C |
| YX130266BA | G/T | T/T | G/G | A/A | A/A | C/C | C/C |
| YX130267BA | G/T | T/T | G/G | A/A | A/A | C/C | C/C |
| YX130268BA | T/T | G/G | A/A | A/A | A/A | C/C | C/C |
| YX130269BA | T/T | G/G | A/A | A/A | A/A | C/C | C/C |

|            |     |     |     |     |     |     |     |
|------------|-----|-----|-----|-----|-----|-----|-----|
| YX130270BA | G/T | T/T | G/G | A/A | A/A | C/C | C/C |
| YX130271BA | T/T | T/T | A/G | A/T | A/G | T/C | C/T |
| YX130273BA | T/T | T/T | A/G | A/T | A/G | T/C | C/T |
| YX130274BA | T/T | T/T | A/G | A/A | A/A | C/C | C/C |
| YX130275BA | T/T | T/T | A/G | A/A | A/A | C/C | C/C |
| YX130276BA | T/T | T/T | A/G | A/A | A/A | C/C | C/C |
| YX130277BA | T/T | G/G | A/A | A/A | A/A | C/C | C/C |
| YX130279BA | T/T | -   | A/A | A/A | A/A | C/C | C/C |
| YX130281BA | T/T | G/G | A/A | A/T | A/G | T/C | C/T |
| YX130282BA | T/T | G/G | A/A | A/A | A/A | C/C | C/C |
| YX130283BA | T/T | T/T | A/G | A/A | A/A | C/C | C/C |
| YX130284BA | T/T | G/G | A/A | A/A | A/A | C/C | C/C |
| YX130286BA | T/T | G/G | A/A | A/A | A/A | C/C | C/C |
| YX130287BA | T/T | T/T | A/G | A/A | A/A | C/C | C/C |
| YX130288BA | T/T | -   | A/G | A/A | A/A | C/C | C/C |
| YX130289BA | T/T | G/G | A/A | A/T | A/G | T/C | C/T |
| YX130290BA | T/T | G/G | A/A | A/A | A/A | C/C | C/C |
| YX130292BA | T/T | G/G | A/A | A/A | A/A | C/C | C/C |
| YX130293BA | T/T | G/G | A/A | A/A | A/A | C/C | C/C |
| YX130294BA | T/T | T/T | A/G | A/T | A/G | T/C | C/T |

|            |     |     |     |     |     |     |     |
|------------|-----|-----|-----|-----|-----|-----|-----|
| YX130295BA | T/T | T/T | A/G | A/T | A/G | T/C | C/T |
| YX130296BA | T/T | T/T | A/G | A/A | A/A | C/C | C/C |
| YX130297BA | T/T | G/G | A/A | A/T | A/G | T/C | C/T |
| YX130298BA | T/T | G/G | A/A | A/T | A/G | T/C | C/T |
| YX130299BA | T/T | T/T | A/G | A/A | A/A | C/C | C/C |
| YX130402BA | T/T | -   | A/A | A/T | A/G | T/C | C/T |
| YX130404BA | T/T | G/G | A/A | A/A | A/A | C/C | C/C |
| YX130406BA | T/T | G/G | A/A | A/A | A/A | C/C | C/C |
| YX130407BA | T/T | G/G | A/A | A/A | A/A | C/C | C/C |
| YX130409BA | G/T | T/T | G/G | A/A | A/A | C/C | C/C |
| YX130410BA | T/T | G/G | A/A | A/A | A/A | C/C | C/C |
| YX130412BA | G/T | T/T | G/G | A/A | A/A | C/C | C/C |
| YX130415BA | T/T | T/T | A/G | A/A | A/A | C/C | C/C |
| YX130420BA | T/T | G/G | A/A | A/A | A/A | C/C | C/C |
| YX130446BA | G/T | T/T | G/G | A/A | A/A | C/C | C/C |
| YX130451BA | G/T | T/T | G/G | A/A | A/A | C/C | C/C |
| YX130452BA | T/T | T/T | A/G | A/A | A/G | C/C | C/T |
| YX130453BA | G/T | T/T | G/G | A/A | A/A | C/C | C/C |
| YX130455BA | T/T | G/G | A/A | A/A | A/A | C/C | C/C |
| YX130456BA | T/T | G/G | A/A | A/A | A/A | C/C | C/C |

|            |     |     |     |     |     |     |     |
|------------|-----|-----|-----|-----|-----|-----|-----|
| YX130457BA | G/T | T/T | G/G | A/A | A/A | C/C | C/C |
| YX130458BA | T/T | T/T | A/G | A/T | A/G | T/C | C/T |
| YX130459BA | T/T | G/G | A/A | A/A | A/A | C/C | C/C |
| YX130461BA | T/T | T/T | A/G | A/A | A/A | C/C | C/C |
| YX130462BA | T/T | T/T | A/G | A/T | A/G | T/C | C/T |
| YX130470BA | T/T | T/T | A/G | A/A | A/A | C/C | C/C |
| YX130472BA | T/T | G/G | A/A | A/A | A/A | C/C | C/C |
| YX130702BA | T/T | T/T | A/G | A/A | A/A | C/C | C/C |
| YX130707BA | T/T | T/T | A/G | A/A | A/A | C/C | C/C |
| YX130709BA | T/T | T/T | A/G | A/A | A/A | C/C | C/C |
| YX130711BA | T/T | T/T | A/G | A/A | A/A | C/C | C/C |
| YX130714BA | T/T | G/G | A/A | A/A | A/A | C/C | C/C |
| YX130715BA | T/T | G/G | A/A | A/A | A/A | C/C | C/C |
| YX130716BA | T/T | T/T | A/G | T/T | G/G | T/T | T/T |
| YX130720BA | T/T | G/G | A/A | A/A | A/A | C/C | C/C |
| YX130721BA | T/T | G/G | A/A | A/T | A/G | T/C | C/T |
| YX130723BA | T/T | T/T | A/G | A/T | A/G | T/C | C/T |
| YX130724BA | T/T | T/T | A/G | A/A | A/A | C/C | C/C |
| YX130725BA | T/T | T/T | A/G | A/A | A/A | C/C | C/C |
| YX130726BA | T/T | T/T | A/G | A/T | A/G | T/C | C/T |

|            |     |     |     |     |     |     |     |
|------------|-----|-----|-----|-----|-----|-----|-----|
| YX130727BA | G/T | T/T | G/G | A/A | A/A | C/C | C/C |
| YX130755BA | T/T | T/T | A/G | A/T | A/G | T/C | C/T |
| YX130756BA | T/T | G/G | A/A | A/A | A/A | C/C | C/C |
| YX130801BA | T/T | G/G | A/A | A/A | A/A | C/C | C/C |
| YX130802BA | G/T | T/T | G/G | A/T | A/G | T/C | C/T |
| YX130803BA | T/T | G/G | A/A | A/T | A/G | T/C | C/T |
| YX130804BA | T/T | G/G | A/A | A/A | A/A | C/C | C/C |
| YX130805BA | T/T | T/T | A/G | A/T | A/G | T/C | C/T |
| YX130807BA | T/T | G/G | A/A | A/A | A/A | C/C | C/C |
| YX130809BA | T/T | G/G | A/A | A/A | A/A | C/C | C/C |
| YX130810BA | T/T | T/T | A/G | A/T | A/G | T/C | C/T |
| YX130811BA | T/T | T/T | A/G | A/A | A/A | C/C | C/C |
| YX130813BA | T/T | T/T | A/G | A/A | A/A | C/C | C/C |
| YX130814BA | T/T | T/T | A/G | A/A | A/A | C/C | C/C |
| YX130815BA | T/T | G/G | A/A | A/T | A/G | T/C | C/T |
| YX130816BA | T/T | T/T | A/G | A/A | A/A | C/C | C/C |
| YX130819BA | G/T | T/T | G/G | A/A | A/A | C/C | C/C |
| YX130824BA | T/T | T/T | A/G | A/A | A/A | C/C | C/C |
| YX130827BA | T/T | G/G | A/A | A/A | A/A | C/C | C/C |
| YX130830BA | T/T | T/T | A/G | A/A | A/A | C/C | C/C |

|            |     |     |     |     |     |     |     |
|------------|-----|-----|-----|-----|-----|-----|-----|
| YX130832BA | T/T | T/T | A/G | A/A | A/A | C/C | C/C |
| YX130836BA | T/T | T/T | A/G | A/A | A/A | C/C | C/C |
| YX130837BA | T/T | T/T | A/G | A/A | A/A | C/C | C/C |
| YX130838BA | T/T | T/T | A/G | A/A | A/A | C/C | C/C |
| YX130839BA | T/T | T/T | A/G | A/A | A/A | C/C | C/C |
| YX130840BA | G/T | T/T | -   | A/A | A/A | C/C | C/C |
| YX130841BA | T/T | G/G | A/A | A/A | A/A | C/C | C/C |
| YX130842BA | T/T | T/T | A/G | A/T | A/G | T/C | -   |
| YX130843BA | G/T | -   | G/G | A/T | A/G | T/C | -   |
| YX130844BA | T/T | G/G | A/A | A/A | A/A | C/C | C/C |
| YX130845BA | T/T | T/T | A/G | A/T | A/G | T/C | C/T |
| YX130846BA | T/T | T/T | A/G | A/A | A/A | C/C | C/C |
| YX130847BA | G/T | T/T | G/G | T/T | G/G | T/T | T/T |
| YX130848BA | T/T | T/T | A/G | A/A | A/A | C/C | C/C |
| YX130849BA | T/T | G/G | A/A | A/A | A/A | C/C | C/C |
| YX130850BA | T/T | T/T | A/G | A/A | A/A | C/C | C/C |
| YX130851BA | T/T | G/G | A/A | A/A | A/A | C/C | C/C |
| YX130852BA | T/T | T/T | A/G | A/A | A/A | C/C | C/C |
| YX130853BA | T/T | G/G | A/A | T/T | G/G | T/T | T/T |
| YX130854BA | T/T | T/T | A/G | A/A | A/A | C/C | C/C |

|            |     |     |     |     |     |     |     |
|------------|-----|-----|-----|-----|-----|-----|-----|
| YX130855BA | T/T | T/T | A/G | A/T | A/G | T/C | C/T |
| YX130856BA | T/T | G/G | A/A | A/A | A/A | C/C | C/C |
| YX130857BA | T/T | G/G | A/A | A/A | A/A | C/C | C/C |
| YX130858BA | T/T | T/T | A/G | A/T | A/G | T/C | C/T |
| YX130859BA | T/T | T/T | A/G | A/A | A/A | C/C | C/C |
| YX130860BA | G/T | T/T | G/G | A/T | A/G | T/C | C/T |
| YX130861BA | T/T | G/G | A/A | A/T | A/G | T/C | C/T |
| YX130862BA | T/T | G/G | A/A | A/A | A/A | C/C | C/C |
| YX130863BA | T/T | G/G | A/A | A/A | A/A | C/C | C/C |
| YX130864BA | T/T | G/G | A/A | A/A | A/A | C/C | C/C |
| YX130865BA | T/T | T/T | A/G | A/A | A/A | C/C | C/C |
| YX130866BA | T/T | G/G | A/A | A/A | A/A | C/C | C/C |
| YX130867BA | T/T | T/T | A/G | A/T | A/G | T/C | C/T |
| YX130869BA | T/T | G/G | A/A | A/A | A/A | C/C | C/C |
| YX130870BA | T/T | G/G | A/A | A/T | A/G | T/C | C/T |
| YX130871BA | T/T | G/G | A/A | A/A | A/A | C/C | C/C |
| YX130872BA | G/T | T/T | G/G | A/T | A/G | T/C | C/T |
| YX130873BA | G/T | T/T | G/G | A/A | A/A | C/C | C/C |
| YX130874BA | T/T | G/G | A/A | A/A | A/A | C/C | C/C |
| YX130875BA | T/T | G/G | A/A | A/A | A/A | C/C | C/C |

|            |     |     |     |     |     |     |     |
|------------|-----|-----|-----|-----|-----|-----|-----|
| YX130876BA | T/T | G/G | A/A | A/A | A/A | C/C | C/C |
| YX130877BA | T/T | G/G | A/A | A/A | A/A | C/C | C/C |
| YX130878BA | T/T | T/T | A/G | A/A | A/A | C/C | C/C |
| YX130879BA | G/T | T/T | G/G | A/A | A/A | C/C | C/C |
| YX130880BA | T/T | G/G | A/A | A/A | A/A | C/C | C/C |
| YX130881BA | T/T | T/T | A/G | A/T | A/G | T/C | C/T |
| YX130882BA | T/T | T/T | A/G | A/A | A/A | C/C | C/C |
| YX130883BA | T/T | T/T | A/G | A/T | A/G | T/C | C/T |
| YX130884BA | T/T | G/G | A/A | A/A | A/A | C/C | C/C |
| YX130885BA | T/T | G/G | A/A | A/A | A/A | C/C | C/C |
| YX130886BA | G/T | T/T | G/G | A/A | A/A | C/C | C/C |
| YX130887BA | T/T | T/T | A/G | A/A | A/A | C/C | C/C |
| YX130888BA | T/T | G/G | A/A | A/A | A/A | C/C | C/C |
| YX130889BA | G/T | T/T | G/G | A/A | A/A | C/C | C/C |
| YX130890BA | T/T | G/G | A/A | A/A | A/A | C/C | C/C |
| YX130892BA | T/T | G/G | A/A | A/A | A/A | C/C | C/C |
| YX130893BA | T/T | G/G | A/A | A/A | A/A | C/C | C/C |
| YX130894BA | T/T | T/T | A/G | A/A | A/A | C/C | C/C |
| YX130895BA | T/T | T/T | A/G | A/A | A/A | C/C | C/C |
| YX130896BA | T/T | G/G | A/A | A/A | A/A | C/C | C/C |

|            |     |     |     |     |     |     |     |
|------------|-----|-----|-----|-----|-----|-----|-----|
| YX130897BA | T/T | G/G | A/A | A/T | A/G | T/C | C/T |
| YX130898BA | T/T | -   | A/A | A/A | A/A | C/C | C/C |
| YX130899BA | T/T | G/G | A/A | A/A | A/A | C/C | C/C |
| YX130900BA | T/T | T/T | A/G | A/A | A/A | C/C | C/C |
| YX130930BA | T/T | G/G | A/A | A/A | A/A | C/C | C/C |
| YX130931BA | T/T | T/T | A/G | A/A | A/A | C/C | C/C |
| YX130932BA | T/T | G/G | A/A | A/A | A/A | -   | C/C |
| YX130933BA | T/T | T/T | A/G | A/A | A/A | C/C | C/C |
| YX130934BA | T/T | G/G | A/A | A/A | A/A | C/C | C/C |
| YX130935BA | T/T | G/G | A/A | A/T | A/G | T/C | C/T |
| YX130936BA | T/T | T/T | A/G | A/A | A/A | C/C | C/C |
| YX1310003  | T/T | G/G | A/A | A/T | A/G | T/C | C/T |
| YX1310010  | T/T | T/T | A/G | T/T | G/G | T/C | T/T |
| YX1310011  | G/T | T/T | G/G | A/T | A/G | T/C | C/T |
| YX1310012  | G/T | T/T | G/G | A/A | A/A | C/C | C/C |
| YX1310013  | T/T | G/G | A/A | A/A | A/A | C/C | C/C |
| YX1310014  | T/T | T/T | A/G | A/A | A/A | C/C | C/C |
| YX1310015  | T/T | T/T | A/G | A/A | A/A | C/C | C/C |
| YX1310017  | T/T | G/G | A/A | A/A | A/A | C/C | C/C |
| YX1310019  | T/T | T/T | A/G | A/T | A/G | T/C | C/T |

|             |     |     |     |     |     |     |     |
|-------------|-----|-----|-----|-----|-----|-----|-----|
| YX1310020   | T/T | G/G | A/A | A/A | A/A | C/C | C/C |
| YX1310021   | T/T | G/G | A/A | -   | A/A | C/C | C/C |
| YX1370024BA | T/T | T/T | A/G | A/A | A/A | C/C | C/C |
| YX1370025   | T/T | G/G | A/A | A/T | A/G | T/C | C/T |
| YX1370026BA | T/T | G/G | A/A | A/A | A/A | C/C | C/C |
| YX1370027BA | G/T | T/T | G/G | A/A | A/A | C/C | C/C |
| YX1370028BA | T/T | T/T | A/G | A/T | A/G | T/C | C/T |
| YX1370030BA | G/T | T/T | G/G | A/T | A/G | T/C | C/T |
| YX1370031BA | T/T | G/G | A/A | A/A | A/A | C/C | C/C |
| YX1370032BA | T/T | G/G | A/A | A/T | A/G | T/C | C/T |
| YX1370033BA | T/T | T/T | A/G | A/T | A/G | T/C | C/T |
| YX1370034BA | G/T | T/T | G/G | A/A | A/A | C/C | C/C |
| YX1370035BA | G/T | T/T | G/G | A/A | A/A | C/C | C/C |
| YX1370036BA | T/T | T/T | A/G | A/A | A/A | C/C | C/C |
| YX1370037BA | T/T | G/G | A/A | A/A | A/A | C/C | C/C |
| YX1370038BA | G/T | T/T | G/G | A/A | A/A | C/C | C/C |
| YX1370039BA | T/T | G/G | A/A | A/A | A/A | C/C | C/C |
| YX1370040BA | T/T | G/G | A/A | A/A | A/A | C/C | C/C |
| YX1370041BA | G/T | T/T | G/G | A/T | A/G | T/C | C/T |
| YX1370042BA | T/T | G/G | A/A | A/A | A/A | C/C | C/C |

|             |     |     |     |     |     |     |     |
|-------------|-----|-----|-----|-----|-----|-----|-----|
| YX1370043BA | T/T | G/G | A/A | A/A | A/A | -   | C/C |
| YX1370044BA | T/T | G/G | A/A | A/A | A/A | C/C | C/C |
| YX1370045BA | T/T | T/T | A/G | A/A | A/A | C/C | C/C |
| YX1370046   | T/T | G/G | A/A | A/A | A/A | C/C | C/C |
| YX1370047BA | T/T | G/G | A/A | A/A | A/A | C/C | C/C |
| YX1370048BA | G/T | T/T | G/G | A/A | A/A | C/C | C/C |
| YX1370049BA | T/T | G/G | A/A | A/A | A/A | C/C | C/C |
| YX1380003   | T/T | G/G | A/A | A/A | A/A | C/C | C/C |
| YX1380004   | T/T | G/G | A/A | A/T | A/G | T/C | C/T |
| YX1380005   | T/T | T/T | A/G | A/T | A/G | T/C | C/T |
| YX1380006   | T/T | T/T | A/G | A/A | A/A | C/C | C/C |
| YX1380009   | T/T | T/T | A/G | A/A | A/A | C/C | C/C |
| YX1380010   | T/T | T/T | A/G | A/A | A/A | C/C | C/C |
| YX1380011   | T/T | G/G | A/A | A/T | A/G | T/C | C/T |
| YX1380012   | T/T | G/G | A/A | A/T | A/G | T/C | C/T |
